# Supplementary material
Source: PubMed Central journal article supplement (PMC6900500)
Supplement: pnas.1916306116.sapp.pdf [file pnas.1916306116.sapp.pdf]

1 **Supplementary Information**

2 **Roles of ErbB3 binding protein 1 (EBP1) in embryonic development and gene-silencing control**

3 Hyo Rim Ko<sup>1,2</sup>, Inwoo Hwang<sup>1,2</sup>, Eun-Ju Jin<sup>1,2</sup>, Taegwan Yun<sup>1,2</sup>, Dongryeol Ryu<sup>1</sup>, Jong-Sun Kang<sup>1,2,3</sup>,  
4 Kye Won Park<sup>4</sup>, Joo-Ho Shin<sup>1,2,3</sup>, Sung-Woo Cho<sup>5</sup>, Kyung-Hoon Lee<sup>3,6</sup>, Keqiang Ye<sup>7</sup> and Jee-Yin  
5 Ahn<sup>1,2,3\*</sup>

6 **\*Correspondence should be addressed to** Jee-Yin Ahn, Department of Molecular Cell Biology,  
7 Sungkyunkwan University School of Medicine, 2066, Seobu-ro, Jangan-gu, Suwon 16419, Korea  
8 Phone: 82-31-299-6134; Fax: 82-31-299-6139; E-mail: jeeahn@skku.edu

9

10 **This PDF file includes:**

11 Supplementary text

12 Figures S1 to S6

13 Legends for Dataset S1 to S4

14 **Materials and Methods**

15 **Animal**

16 The mouse *Ebp1* gene is located on chromosome 10 (NM\_011119). The *Ebp1* gene is  
17 composed of 10 exons and extends over 8.4kb. The mouse *Ebp1* knock mouse was generated in  
18 collaboration with genOway (Lyon, France). *Ebp1* conditional knock-out mice were generated by  
19 introduction of two *loxP* sites flanking *Ebp1* exons 6 to 10 and enable the monitoring of *Ebp1*  
20 expression cells thanks to the insertion of an IRES-reporter (eGFP) cassette downstream of the stop  
21 codon. Insertion of the construct selected for the neomycin marker in the targeting vector and the neo  
22 cassette was flanked by *frt* sites. The construct was transfected into ES cells according to genOway's  
23 standard electroporation procedures. The selected ES cells by Polymerase chain reaction (PCR) and  
24 Southern Blot based screenings were injected into blastocyst.

25 To neuronal- specific deletion of *Ebp1*, homozygous mutant *Ebp1* allele (*Ebp1*<sup>fl<sup>ox</sup>/fl<sup>ox</sup></sup>) were  
26 crossed with the Nestin-cre mice. Offspring were weaned after 4 weeks and marked by ear clipping.

27 The genomic DNA was prepared from the tail (Sigma Aldrich, Saint Louis, MO, USA) and  
28 was genotyped using PCR analysis. The primer pair was designed for the detection of the cre-  
29 mediated excision event.

30 All animal experimentation was reviewed and approved by the Institutional Animal Care  
31 and Use Committee (IACUC) of Sungkyunkwan University School of Medicine (SUSM,  
32 SKKUIACUC 17-6-4-1). All experimental procedures were carried out in accordance with the  
33 regulations of the IACUC guideline of Sungkyunkwan University.

34 **Antibodies**

35 Anti-Bax (cat. 2772), and anti-Bcl2 (cat. 2870s) antibodies were acquired from Cell  
36 Signaling (Danvers, MA, USA). Anti- $\beta$ -actin (cat. sc-47778), anti-survivin (cat. sc-17779), anti-p21  
37 (cat. sc-6246), and anti-GFP (cat. sc-9996) antibodies were acquired from Santa Cruz Biotechnology  
38 (Dallas, TX, USA). Anti-*Ebp1* (cat. ab33613, ab186846), anti-BrdU (cat. ab6326), anti-DNMT1 (cat.

39 ab13537), anti-annexin V (cat. ab14196), and anti-ki67 (cat. ab8191) antibodies were obtained from  
40 Abcam (Cambridge, MA, USA). Anti-PCNA was acquired from Calbiochem. Anti-H3k9me3 (cat. 07-  
41 442) was obtained from Millipore (Burlington, Massachusetts, USA).

## 42 **Public Dataset analyses**

43 The covariation among genes (Fig. 3B and 6D) were evaluated with Pearson correlation coefficient  
44 and Spearman's Rank-Order Correlation with corresponding p values (two-tailed). All raw data of  
45 gene expression profile are publicly available on NCBI Gene Expression Omnibus (NCBI GEO,  
46 [www.ncbi.nlm.nih.gov/geo](http://www.ncbi.nlm.nih.gov/geo)) and GeneNetwork ([www.genenetwork.org](http://www.genenetwork.org)). The gene expression profiles  
47 were obtained from the human prefrontal cortex transcriptomes (NCBI GEO No. GSE36192), the  
48 monkey (*Macaca Fascicularis*) prefrontal cortexes transcriptomes (GeneNetwork Accession No.  
49 GN251), the brain transcriptomes of BXD mouse genetic reference population (GeneNetwork  
50 Accession No. GN123), and the brain transcriptomes of B6D2-F2 intercross mouse population  
51 (GeneNetwork Accession No. GN123). (PMID: 22433082, 20485568; 16783646; 22939713;  
52 16783644; 27933521) Correlogram and interaction network were generated using RStudio (R  
53 Consortium Inc, Boston, MA) as described in the previous study (PMID: 27986797).

## 54 **Western blotting**

55 MEF and 293t cells were washed with 15 mL of PBS and immediately added to lysis buffer  
56 (50 mM Tris-Cl, pH 7.4, 150 mM NaCl, 1 mM EDTA, 0.5% Triton X-100, 1.5 mM Na<sub>3</sub>VO<sub>4</sub>, 50 mM  
57 sodium fluoride, 10 mM sodium pyrophosphate, 10 mM beta-glycerolphosphate, 1 mM PMSF, and  
58 protease cocktail). The cell lysates were mixed with 5× SDS sample buffer, boiled, and analyzed by  
59 immunoblotting. Protein levels were quantified by densitometry and normalized to actin (ImageJ  
60 software).

## 61 **Reverse transcriptase polymerase chain reaction and qPCR**

62 Total RNA was extracted using the TAKARA miniBEST Universal RNA Extraction kit  
63 (TAKARA, Japan) according to the manufacturer's instructions. The reverse transcription reaction  
64 was performed using the PrimeScript 1st strand cDNA Synthesis kit (TAKARA, Japan). Data  
65 normalization of transcript concentrations was performed using GAPDH.

#### 66 **Cresyl violet staining**

67 Cresyl violet acetate crystal powder was dissolved in distilled water. The solution was  
68 filtered using Whatman paper. Paraffin section slides were immersed in xylene and rehydrated by  
69 passing the tissue through a series of decreasing concentrations of ethanol (100% to 70% ethanol).  
70 The slides were immersed in cresyl violet staining solution for 5 min and washed in distilled water.  
71 The slices were dehydrated by passing the tissue through a series of increasing ethanol concentrations  
72 (70% to 100% ethanol). The final two immersions were in xylene solution. The slides were examined  
73 with a microscope (Aperio ScanScope slide scanner), and their image was captured using ImageScope  
74 software.

#### 75 **FACS analysis**

76 MEF cells were fixed with 70% ethanol and store at -20°C then cells washed twice with cold  
77 PBS. Cells were incubated in PBS containing 10 µg/ml RNase A and 20 µg/ml PI and transfer to  
78 FACS tubes and incubate at room temperature in the dark for 30 minutes. Cells were analyzed by a  
79 FACS Canto II.

#### 80 **Immunofluorescence**

81 Mouse embryos were fixed in 4% paraformaldehyde for 15 min, permeabilized in PBS  
82 containing 0.25% Triton X-100 for 1 h, and blocked in 1% BSA for 1 h. The slices were  
83 immunostained using primary antibodies and the appropriate Alexa Fluor 594 goat anti-rabbit and  
84 Alexa Fluor 488 goat anti-mouse secondary antibodies. Nuclei were counterstained with DAPI stain.

85 Immunostained images were acquired using a laser scanning confocal microscope (LSM 710, Carl  
86 Zeiss, Germany). Fluorescent images were quantified on a pixel-by-pixel basis using a microscope  
87 and Zeiss ZEN software.

#### 88 **Global methylation assay**

89 Genomic DNA was extracted from E13.5 *Ebp1* wild-type (*Ebp1*<sup>(+/+)</sup>), heterozygous  
90 (*Ebp1*<sup>(+/-)</sup>), and homozygous mutant (*Ebp1*<sup>(-/-)</sup>) embryonic brain using Accuprep<sup>®</sup> Genomic DNA  
91 Extraction kit (Cat. No. K-3032, Bioneer, Korea). Global DNA methylation levels were measured by  
92 Imprint<sup>®</sup> Methylated DNA Quantification kit (Cat. No. MDQ1, Sigma-Aldrich, St Louis, MO, USA),  
93 according to manufacturer's instruction.

#### 94 **ChIP assay**

95 A ChIP assay was performed using a ChIP assay kit (cat. 17-259, Millipore, Temecula, CA  
96 92590, USA) according to the manufacturer's instructions. In brief, a histone was crosslinked to DNA  
97 by adding formaldehyde to the culture medium for 10 min at room temperature. Glycine was added  
98 for 5 min to quench any unreacted formaldehyde. The cells were scraped into e-tubes and centrifuged  
99 at 700 × *g* at 4°C for 1 min. The supernatant was removed, and the cell pellet was resuspended in SDS  
100 lysis buffer containing 1× protease inhibitor cocktail. For immunoprecipitation, the dilution buffer,  
101 chromatin, protein G agarose, and antibody were mixed and stored overnight at 4°C with rotation. The  
102 protein G agarose-antibody/chromatin complex was washed by resuspending the beads in 1-mL cold  
103 buffers (low salt immune complex wash buffer, high salt immune complex wash buffer, LiCl immune  
104 complex wash buffer, and TE buffer in regular sequence). Elution buffer was added to the  
105 antibody/agarose complex, mixed by flicking the tube gently, and incubated at room temperature for  
106 15 min. To reverse crosslink of the protein/DNA complexes to free DNA, 5 M NaCl was added, and  
107 the mixture was incubated at 65°C for 6 h. DNA was purified using spin columns.

#### 108 **Embryo brain slice culture**

109 Embryo brain slice cultures were prepared from E14.5 mouse brains. The 280- $\mu\text{m}$  thick brain  
110 slices were obtained by vibratome sectioning (Leica VT1200, Leica Biosystems) in chilled MEMp  
111 [50% (vol/vol) minimum essential medium (MEM), 25 mM HEPES, and 2 mM glutamine without  
112 antibiotics, adjusted to pH 7.2–7.3 with 1 M NaOH]. The slices were transferred onto semi-porous  
113 membrane inserts (Millipore, 0.4- $\mu\text{m}$  pore diameter, Schwalbach, Germany). Intact slices were  
114 cultured at 37°C and 5% CO<sub>2</sub> in maintaining medium [neurobasal medium, 2% B27, 2 mM glutamine,  
115 1% penicillin/streptomycin solution, 0.5 % Glucose, and 1mg/ml gentamycin]. The medium was  
116 changed every other day. The slices were infected after DIV 2 and cultured for an additional 12 days.  
117 The slices were fixed with 4% PFA at DIV 14.

### 118 **Micro-CT**

119 E13.5 Ebp1 WT and knockout embryo samples were immersed in Lugo's solution. We used  
120 the Siemens Inveon Micro-CT scanner, which is designed as an *in-vivo* system (Siemens Medical  
121 Solutions, Knoxville, USA). All samples were scanned with 1.5-mm aluminium filter, using the  
122 following settings: 180° total rotation and 600 rotation steps, 70 kV and 400  $\mu\text{A}$  source setting, and  
123 3,000 ms exposure time per step. Pixels were binned by 2, resulting in an effective pixel size or  
124 resolution of approximately 19.98  $\mu\text{m}$ . For each scan, the dataset was reconstructed with a  
125 downsample factor of 1 using the Inveon Acquisition Workplace (IAW) software package (IAW,  
126 Siemens Medical Solutions, Knoxville, TN, USA), implementing the modified Feldkamp filtered back  
127 projection algorithm (Shepp-Logan filter). The reconstructed images were imported using the Inveon  
128 Research Workplace (IRW) into the accompanying two-dimensional (2D) and three-dimensional (3D)  
129 biomedical image analysis software package (IRW, CT Bone Visualization and Analysis, Siemens  
130 Medical Solutions, Knoxville, TN, USA) for visualization and analysis.

### 131 **Methylation-specific PCR**

132 Genomic DNA was extracted from *Ebp1*<sup>(+/+)</sup> and *Ebp1*<sup>(-/-)</sup> MEF cells using the Accuprep®  
 133 Genomic DNA Extraction kit (Bioneer, Daejeon, Korea). After digestion with either *MspI* or *HpaII*  
 134 restriction enzymes using the EpiJET DNA Methylation Analysis kit (Thermo Scientific,  
 135 Massachusetts, USA) the endogenous survivin promoter was amplified. The *HpaII* and *MspI*  
 136 restriction enzymes recognized sites containing CCGG sequence. The *HpaII* restriction enzyme was  
 137 unable to cut methylated cytosine, while *MspI* cut all CCGG sites. The survivin promoter on  
 138 endogenous genomic DNA was amplified by using a survivin promoter-specific 5' primer  
 139 (ACCGCAGCAGAAGGTACAACCTC) and a 3' primer (AAGGGCCAGTTCTTGAAG). PCR  
 140 parameters were as follows: 35 cycles of 94°C for 30 s, 52°C for 30 s, and 72°C for 30 s.

#### 141 Genotype

142 The genomic DNA was prepared from the tail (Sigma Aldrich, Saint Louis, MO,  
 143 USA) and was genotyped using PCR analysis. The primer pair was designed for the detection  
 144 of the cre-mediated excision event.

| Genotype primer sets |                                 |                         |            |             |
|----------------------|---------------------------------|-------------------------|------------|-------------|
| Primer name          | Primer sequence                 | Primer product size(bp) |            |             |
|                      |                                 | Wild-type               | recombined | Cre excised |
| Ebp1-F               | ATTGATGGAGAGAAGACGATTATCCAGAACC | 3205                    | 6298       | 404         |
| Ebp1-R               | ACTTGTAAGCCCAGATAGCCCTTCAGTTG   |                         |            |             |
| Cre-F                | GCGGTCTGGCAGTAAAACTATC          | .                       | .          | 100         |
| Cre-R                | GTGAAACAGCATTGCTGTCACTT         |                         |            |             |

145

#### 146 RNA microarray

147 The RNA microarray service was provided by Macrogen Inc.(Seoul, Republic of Korea).  
 148 RNA purity and integrity were evaluated using a ND-1000 Spectrophotometer (NanoDrop,  
 149 Wilmington, USA) and an Agilent 2100 Bioanalyzer (Agilent Technologies, Palo Alto, USA). RNA

150 labeling and hybridization were performed according to the Agilent One-Color Microarray-Based  
151 Gene Expression Analysis Protocol (Agilent Technology, V 6.5, 2010). Briefly, 100 ng of total RNA  
152 from each sample was linearly amplified and labeled with Cy3-dCTP. The labeled cRNAs were  
153 purified by RNAeasy Mini kit (Qiagen). The concentration and specific activity of the labeled cRNAs  
154 (pmol Cy3/ $\mu$ g cRNA) were measured using NanoDrop ND-1000 (NanoDrop, Wilmington, USA).  
155 Each labeled cRNA (600 ng) were fragmented by adding 5  $\mu$ L of 10 $\times$  blocking agent and 1  $\mu$ L of 25  $\times$   
156 fragmentation buffer and heated at 60 $^{\circ}$ C for 30 min. Finally, 25  $\mu$ L 2 $\times$  GE hybridization buffer was  
157 added to dilute the labeled cRNA. Hybridization solution (40  $\mu$ L) was dispensed into the gasket slide  
158 and assembled for Agilent SurePrint G3 Mouse GE 8X60K, Microarrays (Agilent<sup>®</sup>). The slides were  
159 incubated for 17 h at 65 $^{\circ}$ C in an Agilent hybridization oven and washed at room temperature by using  
160 the Agilent One-Color Microarray-Based Gene Expression Analysis Protocol (Agilent Technology, V  
161 6.5, 2010). The hybridized array was immediately scanned using the Agilent Microarray Scanner D  
162 (Agilent Technologies, Inc.)

163

#### 164 **MBD sequencing**

165 The MBD-seq service was provided by Macrogen Inc.(Seoul, Republic of Korea).  
166 Methylated DNA was obtained using the MethylMiner Methylated DNA Enrichment kit (Invitrogen,  
167 Carlsbad, CA, USA) according to the manufacturer's instructions. Briefly, fragmentation of 1  $\mu$ g of  
168 genomic DNA was performed using adaptive focused acoustic technology (AFA; Covaris) and  
169 captured by MBD proteins. The methylated DNA was eluted in high-salt elution buffer. DNA in each  
170 eluted fraction was precipitated using glycogen, sodium acetate, and ethanol, and resuspended in  
171 DNase-free water. The eluted DNA was used to generate libraries following the standard protocols of  
172 TruSeq Nano DNA Library Prep kit (Illumina). The eluted DNA was repaired, an A was ligated to the  
173 3' end, and TruSeq adapters were ligated to the fragments. Once ligation was assessed, the adapter-  
174 ligated product was PCR amplified. The final purified product was quantified using qPCR according



175 to the qPCR Quantification Protocol and qualified using Agilent Technologies 4200 TapeStation  
176 (Agilent technologies). We sequenced using the HiSeq™ 2500 platform (Illumina). Paired-end  
177 sequencing reads (101 bp) generated from MBD sequencing were verified using FastQC (version  
178 0.10.0). Before starting the analysis, Trimmomatic (version 0.32) was used to remove any adapter  
179 sequences and bases with base qualities lower than 3 from the end reads. Using the sliding window  
180 trim method, bases that did not qualify for window size = 4 and mean quality = 15 were removed.  
181 Thereafter, reads with a minimum length of 36 bp were removed to produce clean data. The cleaned  
182 reads were aligned to the human genome (UCSC mm10) using Bowtie (version 1.1.2 parameter set -n  
183 2 -m 1 -X 600), allowing up to 2 nucleotide mismatches to the reference genome per seed and  
184 returning only uniquely mapped reads. Mapped data (SAM file format) were performed sorting and  
185 indexing using SAMtools (version 0.1.19). PCR duplicates were removed using Picard Mark  
186 Duplicates (version 1.118). The analysis of the MBD data was performed using the MEDIPS package  
187 (version 1.16.0). For each sample, the aligned reads were extended in the sequencing direction to a  
188 length of 300 nt. The sequencing read coverage of the extended reads was calculated at genome-wide  
189 250 bp window size. Subsequently, the resulting coverage profiles (read count, RPKM, and RMS) at  
190 each genomic bin were calculated. Each DMR was annotated using the table browser function of the  
191 UCSC genome browser. Annotation included gene structures, transcripts, promoter regions (defined  
192 as -2 kb upstream of the transcription start site), exons, introns, and CpG islands.

193

#### 194 **ChIP sequencing**

195 The ChIP-seq service was provided by MacroGen Inc.(Seoul, Republic of Korea). ChIPed DNA was  
196 quantified using Quant-IT PicoGreen (Invitrogen) and qualified using the Agilent High Sensitivity  
197 DNA kit on an Agilent 2100 Bioanalyzer (Agilent Technologies). The sequencing libraries were  
198 prepared according to TruSeq ChIP Sample Preparation kit manufacturer's instructions (Illumina, Inc.,  
199 San Diego, CA, USA). Briefly, 10 ng of ChIPed DNA was end-repaired to create 5'-phosphorylated,

200 blunt-ended dsDNA molecules. Following end-repair, DNA was size-selected using a bead-based  
201 method. These DNA fragments went through the addition of a single A base and ligation of the  
202 TruSeq indexing adapters. The products were purified and enriched with PCR to create the final DNA  
203 library. The libraries were quantified using qPCR according to the qPCR Quantification Protocol  
204 (KAPA Library Quantification kits for Illumina Sequencing platforms) and qualified using the  
205 TapeStation D1000 ScreenTape (Agilent Technologies, Waldbronn, Germany). Indexed libraries were  
206 sequenced using the HiSeq2500 platform (Illumina, San Diego, USA by the Macrogen Incorporated).  
207 Library preparation was carried out according to the TruSeq ChIPSeq method (Illumina). Paired-end  
208 sequencing reads (101 bp) generated using a HiSeq4000 instrument were verified for sequence quality  
209 using FastQC (version 0.10.0). Before starting the analysis, Trimmomatic (version 0.32) was used to  
210 remove adapter sequences and bases with base qualities lower than 3 from the end reads. Using a  
211 sliding window trim method, bases that did not qualify for window size = 4 and mean quality = 15  
212 were removed. Thereafter, reads with a minimum length of 36 bp were removed to produce clean data.

213 **Primer list**

| <b>Reverse transcriptase polymerase chain reaction and qPCR</b> |                               |                  |                                        |
|-----------------------------------------------------------------|-------------------------------|------------------|----------------------------------------|
| <b>GENE</b>                                                     | <b>Primer sequence</b>        | <b>GENE</b>      | <b>Primer sequence</b>                 |
| Bcl2                                                            | F: AAG CTG TCA CAG AGG GGC TA | Kdm3a            | F:CAGGTTGGAGCTGGAGACT                  |
| Bcl2                                                            | R: GAC GGT AGC GAC GAG AGA AG | Kdm3a            | R: TCT GCA GTT CAG GAG TGG TG          |
| Bax                                                             | F: TGC AGA GGA TGA TTG CTG AC | Prdm5            | F: AAG GGC TTT GCT CAC AGA AA          |
| Bax                                                             | R: GAT CAG CTC GGG CAC TTT AG | Prdm5            | R: GCC TTA TTG CAC AGC TCA CA          |
| Vegf A                                                          | F: CAG GCT GCT GTA ACG ATG AA | Dnmt1            | F: ACG GAA ACC CAA GGA AGA GT          |
| Vegf A                                                          | R: GCA TTC ACA TCT GCT GTG CT | Dnmt1            | R: TTC CGG TCT TGC TTC TCT GT          |
| Gata 4                                                          | F: GCA GCA GCA GTG AAG AGA TG | Suv39H1          | F: CAG GTA GCT GTT GGC TGT GA          |
| Gata 4                                                          | R: GCG ATG TCT GAG TGA CAG GA | Suv39H1          | R: AGT GCG GAA GAT GCA GAG AT          |
| Cd31                                                            | F: TGC AGG AGT CCT TCT CCA CT | Dot1             | F: TGG CAA GCC TGT CTC CTA CT          |
| Cd31                                                            | R: ACG GTT TGA TTC CAC TTT GC | Dot1             | R: TGG CAG CAC TCA TTT TCT TG          |
| Sox18                                                           | F: AAC AAA ATC CGG ATC TGC AC | Ezh              | F: ATC TGA GAA GGG ACC GGT TT          |
| Sox18                                                           | R: GGT AGG CTC CAG TTG CTC TG | Ezh              | R: TCA GGG TCT TTA ACG GGA TG          |
| Sox17                                                           | F: CTC GGG GAT GTA AAG GTG AA | Survivin         | F: ATC GCC ACC TTC AAG AAC TG          |
| Sox17                                                           | R: GCT TCT CTG CCA AGG TCA AC | Survivin         | R: CAG GGG AGT GCT TTC TAT GC          |
| Endoglin                                                        | F: CTT CCA AGG ACA GCC AAG AG | Sox18            | F: AAA GAA TTC ATG CAG AGA TCG CCG CCC |
| Endoglin                                                        | R: GTG GTT GCC ATT CAA GTG TG | Sox18            | R: AAA GGA TCC CTC CGC ACC CAG AGT GGG |
| Ebp1                                                            | F: AGA GCA TTT GAA GAT GAG    | Ebp1             | R: TCAGTCCCCAGCTTCATT                  |
| <b>ChIP assay</b>                                               |                               |                  |                                        |
| <b>Primer</b>                                                   | <b>Primer sequence</b>        | <b>Primer</b>    | <b>Primer sequence</b>                 |
| Dnmt1 (-500F)                                                   | CTG GCT TTT GCA TTC TGA       | Dnmt1 (+200 R)   | CAA ACG CTG CCC CGC GCA                |
| Survivin (-966F)                                                | ACGTGACAAAACCCCTCTTG          | Survivin (-365R) | CAG GTT CTT CCT GCC TCA AG             |
| Survivin (-364F)                                                | CAG AGC ACA TGG GAC TTG CAG   | Survivin (-115R) | TGC CTT CTG GGA GTG GAC                |
| Survivin (-132F)                                                | GTC CAC TCC CAG AAG GCA       | Survivin (+79R)  | AAG GGC CAG TTC TTG AAG                |

214

215

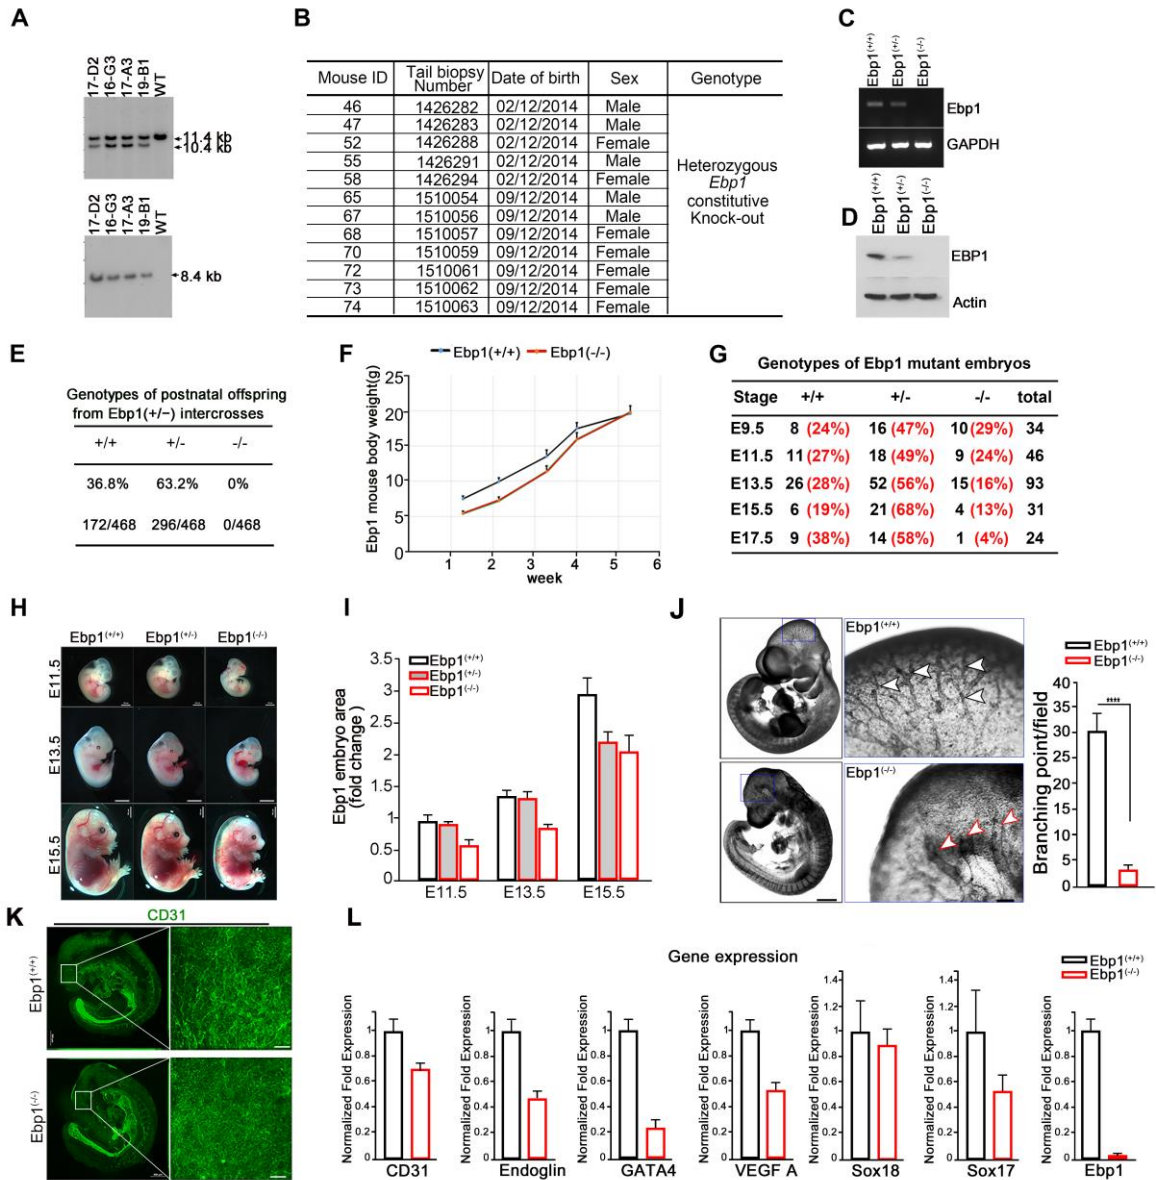

217

218 **Fig. S1 Genetic ablation of *Ebp1* in mice.**

219 (A) Generation of *Ebp1* knockout mice. Selected ES clones by PCR and Southern blot analysis for  
 220 blastocyst injection. (B) Generation of heterozygous *Ebp1* constitutive knockout mice. (C and D)  
 221 *Ebp1* levels were checked in E13.5 mouse brains with the indicated genotypes using RT-PCR (C) and  
 222 immunoblotting (D). The total RNA concentration was determined to GAPDH mRNA, and an equal  
 223 amount of total proteins were detected using anti-Actin antibody. (E) *Ebp1*<sup>(-/-)</sup> mice exhibit embryonic

224 lethality (>468 pups analyzed). The ratio between wild-type and heterozygous mice was  
225 approximately 1:1.7 (36.8% and 63.2%, respectively). (F) Body weights in *Ebp1* wild-type and hetero  
226 mice. Data shown are body weight over 6 weeks. (G) Calculation of the percentage of embryo  
227 genotypes at each time point. (H) Gross morphology of *Ebp1* wild-type (*Ebp1*<sup>(+/+)</sup>), hetero (*Ebp1*<sup>(+/-)</sup>),  
228 and knockout (*Ebp1*<sup>(-/-)</sup>) mouse littermate from E11.5 to E15.5. Scale bar 500  $\mu$ m. (I) Body area of  
229 embryonic *Ebp1* wild-type (*Ebp1*<sup>(+/+)</sup>), hetero (*Ebp1*<sup>(+/-)</sup>), and knockout (*Ebp1*<sup>(-/-)</sup>) mouse from E11.5  
230 to E13.5. (J) Whole-mount CD31 staining of E11.5 of *Ebp1*<sup>(+/+)</sup> and *Ebp1*<sup>(-/-)</sup> brain reveals comparable  
231 microvascular networks (left). Black arrows indicate the branching points and red arrows indicate  
232 blood vessels. Scale bar 100  $\mu$ m. Quantification of branching point measurements from three  
233 independent experiments is shown on the right. Data are shown as mean  $\pm$  SEM; \*\*\*\* $p < 0.0001$   
234 versus the *Ebp1*<sup>(+/+)</sup>. (K) Whole-mount CD31 staining of E11.5 of *Ebp1*<sup>(+/+)</sup> and *Ebp1*<sup>(-/-)</sup>. The  
235 enlargement of the brain reveals microvascular networks. Scale bar 500  $\mu$ m, Scale bar 50  $\mu$ m  
236 (Magnification). (L) Quantitative RT-PCR analysis of angiogenesis-related genes from E13.5  
237 *Ebp1*<sup>(+/+)</sup> or *Ebp1*<sup>(-/-)</sup> Yolk sacs. The mRNA levels of these genes were normalized to that of GAPDH.  
238 The relative fold changes were quantified and shown in the bar graphs.

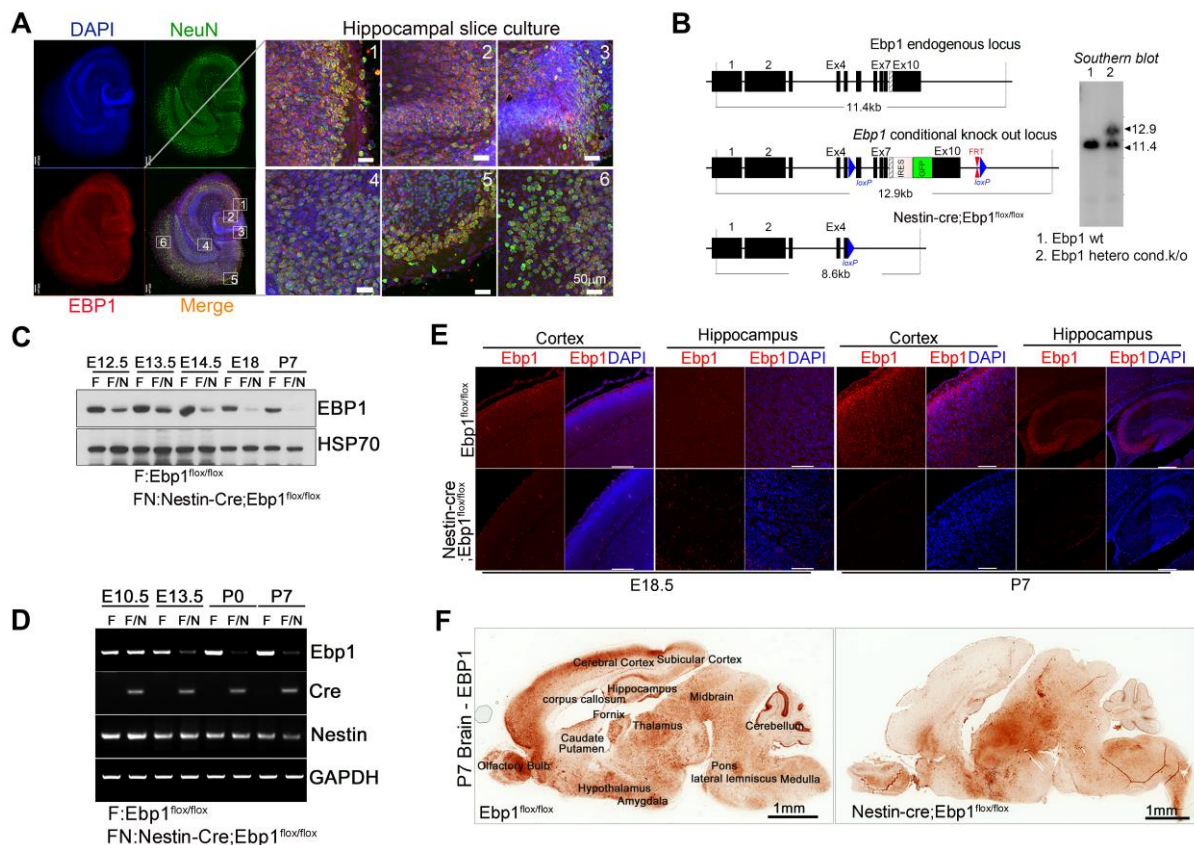

239

240 **Fig. S2 Generation of [Nestin-Cre; *Ebp1*<sup>lox/lox</sup>] mice.**

241 (A) The entorhinal cortex-hippocampus (EH) organotypic slices from P7 mice were cultured for 10  
 242 days and used for immunostaining. Immunofluorescence images were obtained after double-  
 243 immunostaining using anti-EBP1 (red) and NeuN (green). DAPI was used for nuclear staining. Scale  
 244 bar 50  $\mu$ m. (B) Schematic representation of the targeting strategy for the generation of Ebp1  
 245 conditional knockout mice (left). The genomic DNA of the heterozygous conditional knockout tested  
 246 was compared to wild-type DNA by Southern blot analysis (right). (C) Mouse brains with indicated  
 247 genotypes were checked EBP1 levels by immunoblotting. (D) mRNA levels of Ebp1 were detected  
 248 using RT-PCR from E10.5 to P7. The total RNA concentration was determined to GAPDH mRNA. (E  
 249 and F) The paraffin-embedded section of the genotypes indicated was immunostained with anti-EBP1  
 250 antibody at E18.5, and postnatal 7 days (F).

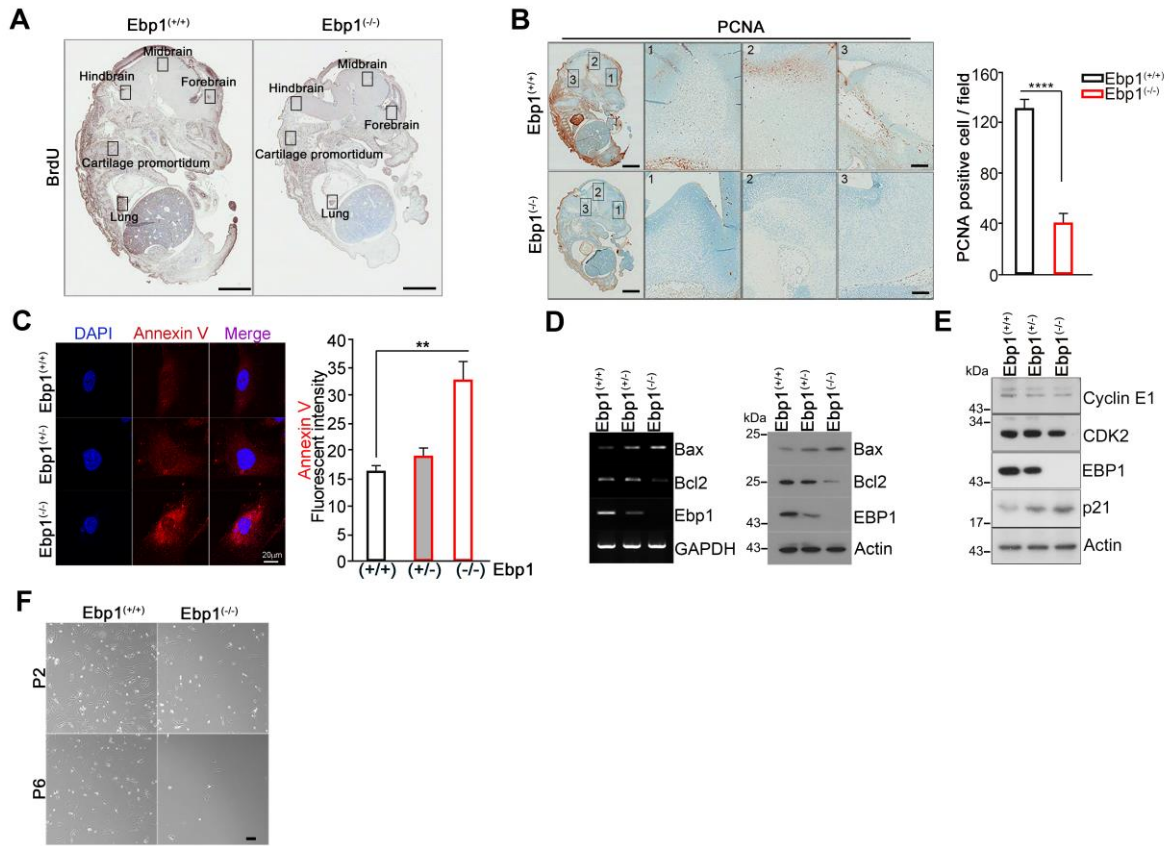

252

253 **Fig. S3 Effect of *Ebp1* loss on apoptosis and cell proliferation.**

254 (A) Paraffin section with indicated genotypes was stained with anti-BrdU antibody (brown). Scale bar  
 255 1 mm. (B) Paraffin section was stained with anti-PCNA antibody. Scale bar 1 mm, scale bar 100  $\mu$ m  
 256 (Enlargement). Quantification of PCNA positive cells is shown as a bar graph. Images shown here are  
 257 representative of at least three independent experiments, and each value represents the mean  $\pm$  SEM  
 258 of triplicate measurements. \*\*\*\* $p < 0.00005$  versus wild-type. (C) MEF cells were stained with  
 259 annexin V (red) and DAPI (blue). The bar graph shows annexin V fluorescence intensity. Data  
 260 represent the mean  $\pm$  SEM of three independent experiments. \*\* $p < 0.005$  versus *Ebp1* wild-type. (D)  
 261 RNA and proteins were isolated from MEF cells (passage 2) of the genotypes indicated. The mRNA  
 262 levels and protein levels of Bax and Bcl2 were determined by RT-PCR and immunoblot. The total

263 RNA concentration was determined to GAPDH mRNA, and an equal amount of total proteins were  
264 detected using anti-actin antibody. (E) Cell cycle-related protein expression was checked in MEF cells  
265 (passage 2) by immunoblotting. Actin served as the loading control. (F) The representative image  
266 shows *Ebp1*<sup>(+/+)</sup> and *Ebp1*<sup>(-/-)</sup> MEF cells at passage 2 and passage 6. Scale bar 100 μm.



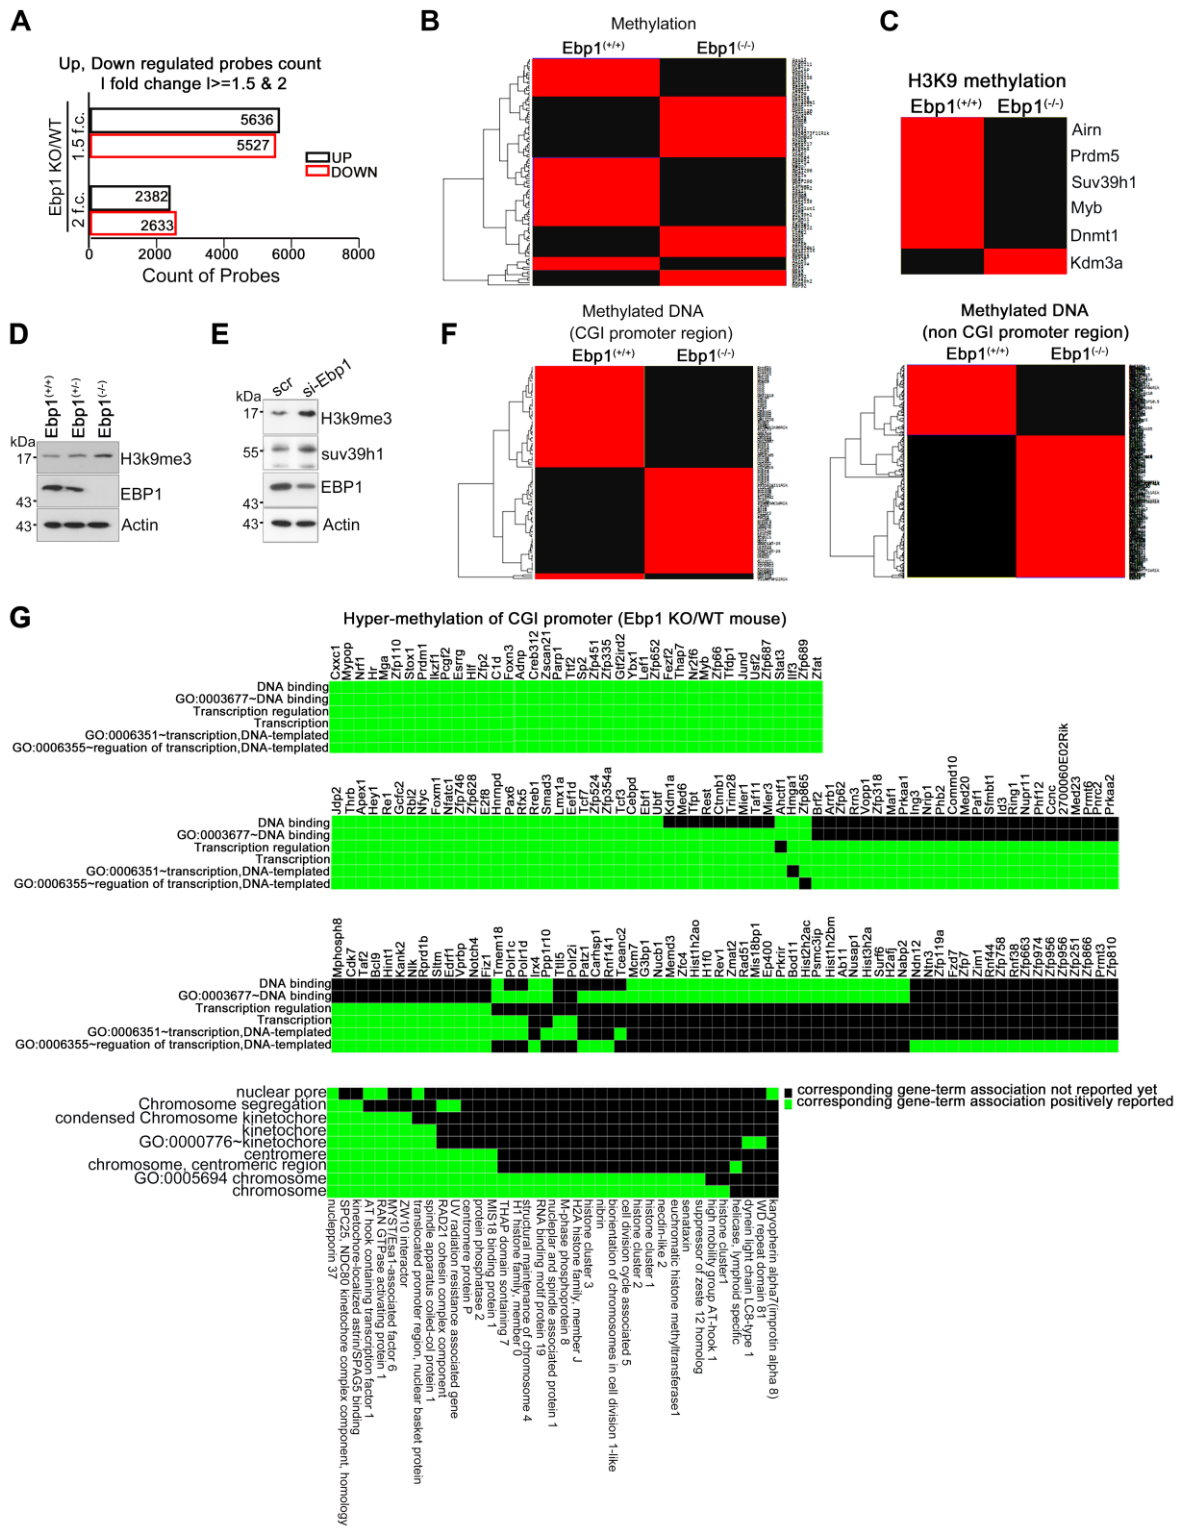

267

268 Fig. S4 Differential DNA methylation region in *Ebp1*<sup>(+/+)</sup> and *Ebp1*<sup>(-/-)</sup> mice.

269 (A) Microarray analysis was conducted by using mouse brain and displayed genes whose expression  
270 was  $\geq 1.5$  or 2.0. fold up- or down-regulated between *Ebp1*<sup>(+/+)</sup> and *Ebp1*<sup>(-/-)</sup> groups. (B) Heatmap is  
271 a representation of microarray data related to methylation between *Ebp1*<sup>(+/+)</sup> and *Ebp1*<sup>(-/-)</sup> groups. The  
272 values of the data are represented in color. Black indicates high expression, and red indicates low  
273 expression. (C) The heatmap shows the level of H3K9 trimethylation related genes between *Ebp1*<sup>(+/+)</sup>  
274 and *Ebp1*<sup>(-/-)</sup> groups. Black indicates high expression, and red indicates low expression. (D) MEF cell  
275 (passage 2) lysates were subjected to western blot. Methylation at histone H3 lysine 9 tri-methylation  
276 (H3K9me3) was detected anti-H3K9me3 antibody. Amount of total proteins were detected using anti-  
277 Actin antibody. (E) 293T cells were transfected with scramble RNA or si-Ebp1 RNA. Twenty-four  
278 hours after transfection, cell lysates were performed western blot. The indicated antibody detected  
279 protein levels. (F) MBD sequencing was performed using *Ebp1*<sup>(+/+)</sup> and *Ebp1*<sup>(-/-)</sup> embryonic brain  
280 (E15.5). The heatmap shows methylated DNA distribution in CGI promoter (left) and non-CGI  
281 promoter region (right) in *Ebp1*<sup>(-/-)</sup> / *Ebp1*<sup>(+/+)</sup> mouse. Black represents high methylation level, and red  
282 indicates low methylation level. (G) Functional GO-term annotation of hyper-methylated CGI  
283 promoter region in *Ebp1*<sup>(-/-)</sup>. Gene lists derived from MBD-seq analysis of *Ebp1*<sup>(-/-)</sup> / *Ebp1*<sup>(+/+)</sup> mouse  
284 were applied to DAVID to identify functional ontological groups. The heatmaps are derived from the  
285 report generated by DAVID and are an annotated-term-focused view that lists annotated genes and  
286 their GO-term. Black color represents gene-term associations not reported yet in DAVID and green  
287 color represents gene-term associations positively reported in DAVID.

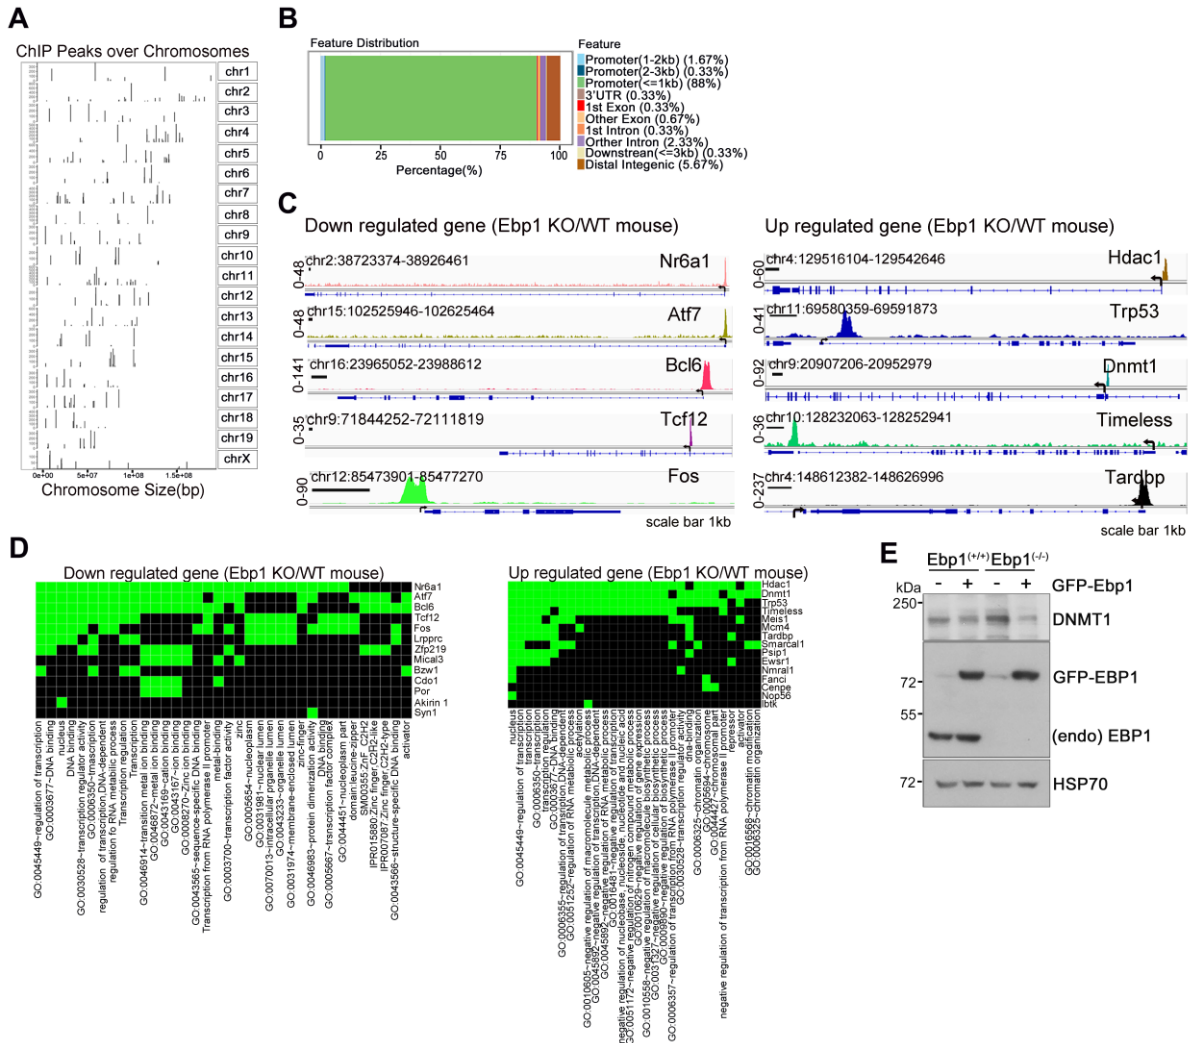

288

289 **Fig. S5 Analysis of EBP1-ChIP-seq data.**

290 (A and B) ChIP assay was performed with anti-EBP1 antibody using mouse embryo fibroblast  
 291 (passage 2). Coverage plot shows EBP1 chromosomal-binding site over the entire chromosome (A)  
 292 and genomic distribution of EBP1-binding sites visualized by ChIP seeker (B). See *SI Appendix*  
 293 *Dataset 2*. (C) MEF cells were used for ChIP-seq analysis with the anti-EBP1 antibody. Integrative  
 294 Genomics Viewer (IGV) track view of ChIP seq density profile for EBP1. (D) Functional GO-term  
 295 annotation of ChIP-seq data analysis. Gene lists derived from ChIP-seq analysis of *Ebp1* were applied  
 296 to DAVID to identify functional ontological groups. Black color represents gene-term associations not  
 297 reported yet in DAVID and green color represents gene-term association positively reported in

298 DAVID. (E) MEF with the indicated genotypes was transfected with control or GFP-Ebp1. DNMT1  
299 expression levels were determined by immunoblotting. HSP70 served as the loading control.

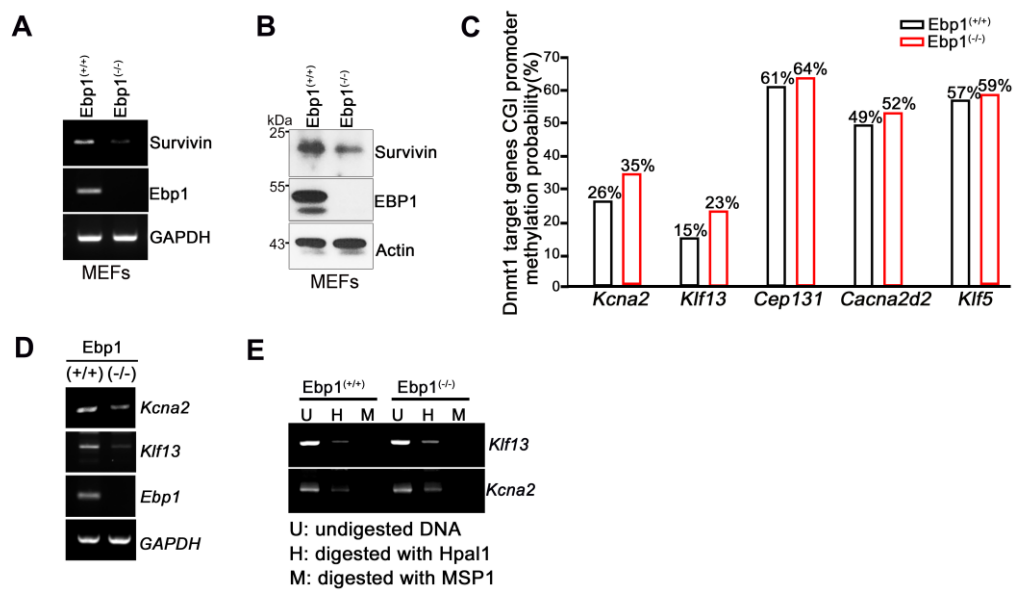

300

301 **Fig. S6 EBP1 impairs DNMT1 mediated promoter methylation.**

302 (A and B) RNA and proteins were isolated from MEF cells (passage 2) with the indicated genotypes.

303 The mRNA levels (A) and protein levels (B) of Survivin and Ebp1 were determined by RT-PCR and

304 immunoblot. The total RNA concentration was determined to GAPDH mRNA, and an equal amount

305 of total proteins were detected using anti-actin antibody. (C) MBD sequencing was performed in

306 E15.5 *Ebp1*<sup>(+/+)</sup> and *Ebp1*<sup>(-/-)</sup> embryonic brain. The bar graph shows the methylation probability of the

307 Dnmt1 target genes CGI promoter region. See *SI Appendix* Dataset S3. (D) RNA was isolated from

308 the brain with the indicated genotypes. The mRNA levels of *Kcna2* and *Klf13* were determined by

309 RT-PCR. The total RNA concentration was determined to GAPDH mRNA. (E) Genomic DNA

310 (gDNA) was extracted from *Ebp1*<sup>(+/+)</sup> and *Ebp1*<sup>(-/-)</sup> embryonic brain. The extracted gDNA was

311 subjected to methylation-specific PCR (MSP). U: undigested DNA, H: digested with Hpa1, M:

312 digested with MSP1.

313

314 **Dataset S1. Correlation matrices showing Pearson's r between *Ebp1* and the other genes.**

315 Correlation matrices are shown Pearson's r between *Ebp1* and the other genes (*i.e.* *Dnmt1*, *Suv39h1*,  
316 *Ezh2*, *Prdm5*, and *Dot1*) in the brain of the monkey (*Macaca Fascicularis*, n = 147), BXD mouse  
317 genetic reference population (n = 50) and B6D2-F2 intercross mouse population (n = 56), and in the  
318 hypothalamus of Mouse diversity panel (n = 17), with the depth of shading of correlogram according  
319 to the magnitude of the correlation and positive and negative correlations represented in blue and red,  
320 respectively.

321 **Dataset S2. EBP1 ChIP-seq data.**

322 ChIP assay was performed with anti-EBP1 antibody using mouse embryo fibroblast (passage 2).

323 **Dataset S3. EBP1 MBD-seq data.**

324 MBD sequencing was performed using *Ebp1*<sup>(+/+)</sup> and *Ebp1*<sup>(-/-)</sup> embryonic brain (E15.5).

325 **Dataset S4. Scatterplots showing the negative correlation between *Ebp1* and *Dnmt1* expression.**

326 Scatterplots are shown the negative correlation between *Ebp1* and *Dnmt1* expression in the brain of  
327 human (n = 147; Pearson's r = -0.46, p < 0.0001; Spearman's rho = -0.38, p < 0.0001), monkey  
328 (*Macaca Fascicularis*, n = 64; Pearson's r = -0.43, p < 0.0001; Spearman's rho = -0.47, p < 0.0001),  
329 BXD mouse genetic reference population (n = 50; Pearson's r = -0.30, p < 0.033; Spearman's rho = -  
330 0.31, p < 0.026), and B6D2-F2 intercross mouse population (n = 56; Pearson's r = -0.33, p < 0.012;  
331 Spearman's rho = -0.28, p < 0.034).
